# Supplementary material for: Ultralow-content Pt nanodots/Ni3Fe nanoparticles: interlayer nanoconfinement synthesis and overall water splitting
Source: Royal Society of Chemistry journal article supplement (doi:10.1039/d4nr00029c), 2024-01-01
Supplement: d4nr00029c1.pdf [file d4nr00029c1.pdf]

## Electronic Supplementary Information (ESI)

### Ultralow-content Pt nanodots/Ni<sub>3</sub>Fe nanoparticles: interlayer nanoconfinement synthesis and overall water splitting

Yajun Ni,<sup>a,‡</sup> Wei Zhang,<sup>a,c,‡</sup> Yaru Li,<sup>a</sup> Shui Hu,<sup>b,\*</sup> Hong Yan,<sup>a,\*</sup> and Sailong Xu<sup>a,c,\*</sup>

<sup>a</sup>State Key Laboratory of Chemical Resource Engineering, <sup>b</sup>State Key Laboratory of Organic-Inorganic Composites, Beijing University of Chemical Technology, Beijing 100029, China. E-mail: xusl@mail.buct.edu.cn (S.X.); yanhong@mail.buct.edu.cn (H.Y.); hushui@mail.buct.edu.cn

<sup>c</sup>Quzhou Institute for Innovation in Resource Chemical Engineering, Quzhou 324003, China

<sup>‡</sup>These authors contributed equally to this work.

#### Experimental Section

##### Theoretical calculations

For Ni<sub>3</sub>Fe,  $\gamma$ -NiOOH, the real active species of the oxygen evolution reaction catalyst, is used as a prototype, and K<sup>+</sup> and protons are cross-solvated because 1 M KOH is used as the electrolyte in the experiments.<sup>1-4</sup> The cell parameters are  $\alpha = 90^\circ$ ,  $\beta = 90^\circ$ ,  $\gamma = 90^\circ$ ,  $a = 8.523 \text{ \AA}$ ,  $b = 9.991 \text{ \AA}$ , and  $c = 15.469 \text{ \AA}$ . For Pt/Ni<sub>3</sub>Fe, the (100) crystallographic plane of  $4 \times 3 \times 1$  is chosen for doping Pt nanodots. Because (100) is a high index crystal plane, this plane exposes unsaturated metal sites, which facilitates the adsorption and desorption of oxygenated intermediates at the metal sites. The chemical formula of Ni<sub>3</sub>Fe is (Fe)<sub>3</sub>K<sub>4</sub>(Ni)<sub>9</sub>H<sub>17</sub>O<sub>32</sub>, and the chemical formula of Pt/Ni<sub>3</sub>Fe is (Fe)<sub>3</sub>PtK<sub>4</sub>(Ni)<sub>8</sub>H<sub>17</sub>O<sub>32</sub>.

For Pt, the Pt(111) is employed with the lattice parameters of  $a = 8.32 \text{ \AA}$ ,  $b = 8.32 \text{ \AA}$ ,  $c = 24.53 \text{ \AA}$ . A 15  $\text{\AA}$  vacuum layer is built up in the  $c$ -axis to avoid modeling in the periodicity in the  $c$ -axis direction.

##### Computational Methods

Density Functional Theory is calculated using Materials studio software 6.1 (Accelrys Software Inc., San Diego, CA). The calculations in this paper were all carried out using the CASTEP module.<sup>5,6</sup> The Perdew-Burke-Ernzerhof (PBE) exchange

correlation in the generalized gradient approximation (GGA)<sup>7</sup> was used in the calculations. However, transition metal systems containing *d* electrons have strong electron-electron interactions that cannot be accurately described by DFT methods. Hubbard-corrected density functional theory was used. The electronic density of states of the hydroxyl oxides were calculated by setting the *U*<sub>eff</sub> values for Ni, and Fe to 6.45,<sup>8</sup> and 4.30 eV,<sup>9</sup> respectively. The energy and displacement convergence standards are  $5 \times 10^{-5}$  eV and 0.005 Å, respectively. The k-point grid in the Brillouin zone is set to be  $3 \times 3 \times 1$  by the Monkhorst-Pack scheme. The cut-off energy is 420 eV.

When the pH is fixed at 0, the entire OER<sup>10</sup> can be defined as



The following are the four electronic reaction steps of the OER approach: In the first step, the catalyst (denoted as \*) absorbs an H<sub>2</sub>O molecule from the solvent and releases H<sup>+</sup>+e<sup>-</sup>, leading to the formation of \*OH. Next, the H<sup>+</sup>+e<sup>-</sup> pair continues to separate from \*OH, leaving \*O. Then, another H<sub>2</sub>O molecule joins and reacts with \*O to form \*OOH, while releasing H<sup>+</sup>+e<sup>-</sup>. Finally, \*OOH can form O<sub>2</sub> and return to \*, while releasing a H<sup>+</sup> + e<sup>-</sup> pair.



In the calculation of the OER overpotential, the standard hydrogen electrode approximation is used, and the standard hydrogen electrode is an assumed ideal state in

which  $\frac{1}{2} H_2 \rightarrow H^+ + e^-$ .<sup>11</sup> The Energy, entropic contribution and zero point energies<sup>12</sup> of hydrogen, oxygen, and water molecules are listed in Table S1.

The Gibbs free energy difference for all of the above primitive steps ( $\Delta G_{*OH}$ ,  $\Delta G_{*O}$ ,  $\Delta G_{*OOH}$ ) contains an electron transfer calculated by Eq. (6):

$$\Delta G = \Delta E + \Delta ZPE - T\Delta S + \Delta G_U + \Delta G_{pH} \quad \#(6)$$

In this equation  $\Delta E$ ,  $\Delta ZPE$  and  $\Delta S$  represent the difference in adsorption energy, zero point energy, and entropy, respectively. The adsorption energy  $\Delta E$  ( $E_{ads}$ ) was calculated using DFT. The values of  $\Delta ZPE$  and  $\Delta S$  were calculated using standard thermodynamic data and density functional theory.  $\Delta G_U = -eU$ , where  $U$  represents the potential based

on a standard hydrogen electrode.  $\Delta G_{pH}$  represents the Gibbs free energy correction with respect to pH, which can be calculated by  $\Delta G_{pH} = -K_B T \ln 10 \cdot pH$ , with  $K_B$  being the Boltzmann constant ( $1.380649 \times 10^{-23} \text{ J K}^{-1}$ ), where the temperature is 298.15 K. The sum of  $\Delta G_1$ ,  $\Delta G_2$ ,  $\Delta G_3$  and  $\Delta G_4$  is equal to the Gibbs free-energy change for the total reaction  $2H_2O(l) \rightarrow 2H_2(g) + O_2(g)$ , i.e., 4.92 eV. Since, in the calculation of the Gibbs function, the standard hydrogen electrode assumption, and in that assumption  $pH = 0$  and  $U = 0$ , both  $\Delta G_U$  and  $\Delta G_{pH}$  are 0 in Eqs. 6. The value of the OER overpotential ( $\eta^{OER}$ ) is unaffected by either the electrolyte pH or the applied bias voltage ( $U$ ).

The change in Gibbs free energy during OER is defined as

$$\Delta G_1 = \Delta G_{*_{OH}} \quad \#(7)$$

$$\Delta G_2 = \Delta G_{*_O} - \Delta G_{*_{OH}} \quad \#(8)$$

$$\Delta G_3 = \Delta G_{*_{OOH}} - \Delta G_{*_O} \quad \#(9)$$

$$\Delta G_4 = 4.92 - \Delta G_{*_{OOH}} \quad \#(10)$$

A theoretical system is constructed to systematically evaluate the performance of different catalysts for oxygen evolution reaction in alkaline electrolytes. The free energies of the four-electron transfer radical steps of the ideal OER catalysts at zero potential should be equal, i.e.,  $4.92 \text{ V} / 4 = 1.23 \text{ V}$  vs. the standard reversible hydrogen electrode (RHE), in other words, the Gibbs free energies of all the four-electron transfer reactions at a starting potential of 1.23 V are 0 eV, and the exceeding value is defined as an overpotential if the actual potential is greater than 1.23 V. The overpotential  $\eta_{OER}$  is given by Eq. (11):

$$\eta^{OER} = \left( \frac{\Delta G^{OER}}{e} \right) - 1.23 \text{ V}, \quad \Delta G^{OER} = \max[\Delta G_1, \Delta G_2, \Delta G_3, \Delta G_4] \quad \#(11)$$

The Gibbs free energy calculation for hydrogen evolution reaction can be calculated by Eq. (12):

$$\Delta G_{*_H} = \Delta E_{*_H} + \Delta ZPE - T\Delta S \quad \#(12)$$

In which  $\Delta G_{*H}$  is the adsorption energy of hydrogen atom on the crystal surface,  $\Delta ZPE$  is the zero point energy difference between adsorbed hydrogen and hydrogen in the gas phase, and  $\Delta S$  is the entropy change of \*H adsorption.

## References

1. J. Zaffran, M. B. Stevens, C. D. M. Trang, M. Nagli, M. Shehadeh, S. W. Boettcher and M. Caspary Toroker, *Chem. Mater.*, 2017, **29**, 4761-4767.
2. H. Shin, H. Xiao and W. A. Goddard, *J. Am. Chem. Soc.*, 2018, **140**, 6745-6748.
3. J. G. Baker, J. R. Schneider, J. A. Garrido Torres, J. A. Singh, A. J. M. Mackus, M. Bajdich and S. F. Bent, *ACS Appl. Energy Mater.*, 2019, **2**, 3488-3499.
4. X. Zheng, J. Tang, A. Gallo, J. A. Garrido Torres, X. Yu, C. J. Athanitis, E. M. Been, P. Ercius, H. Mao, S. C. Fakra, C. Song, R. C. Davis, J. A. Reimer, J. Vinson, M. Bajdich and Y. Cui, *PNAS*, 2021, **118**, e2101817118.
5. M. D. Segall, J. D. L. Philip, M. J. Probert, C. J. Pickard, P. J. Hasnip, S. J. Clark and M. C. Payne, *Condens. Matter*, 2002, **14**, 2717.
6. M. C. Payne, M. P. Teter, D. C. Allan, T. A. Arias and J. D. Joannopoulos, *Rev. Mod. Phys.*, 1992, **64**, 1045-1097.
7. J. P. Perdew, K. Burke and M. Ernzerhof, *Phys. Rev. Lett.*, 1996, **77**, 3865.
8. A. Jain, G. Hautier, S. P. Ong, C. J. Moore, C. C. Fischer, K. A. Persson and G. Ceder, *Phys. Rev. B*, 2011, **84**, 045115.
9. J. M. P. Martirez and E. A. Carter, *J. Am. Chem. Soc.*, 2018, **141**, 693-705.
10. E. Skúlason, T. Bligaard, S. Gudmundsdóttir, F. Studt, J. Rossmeisl, F. Abild-Pedersen, T. Vegge, H. Jónsson and J. K. Nørskov, *Phys. Chem. Chem. Phys.*, 2012, **14**, 1235-1245.
11. J. K. Nørskov, J. Rossmeisl, A. Logadottir, L. Lindqvist, J. R. Kitchin, T. Bligaard and H. Jónsson, *J. Phys. Chem. B*, 2004, **108**, 17886.
12. P. Liao, J. A. Keith and E. A. Carter, *J. Am. Chem. Soc.*, 2012, **134**, 13296-13309.

Figure S1



Figure S1 The XRD pattern of the PtCl<sub>6</sub><sup>2-</sup>/MgNiFe-LDH/GO precursor.

**Figure S2**



**Figure S2** TEM images of (a) Pt/Ni<sub>3</sub>Fe/rGO after etching MgO, and (b) Pt/Ni<sub>3</sub>Fe/rGO that was directly derived from a Mg-free PtCl<sub>6</sub><sup>2-</sup>/NiFe-LDH precursor.

**Figure S3**



**Figure S3** The HRTEM image shows the presence of pores of the Pt/Ni<sub>3</sub>Fe/rGO catalyst after selectively removing the MgO that was formed from the MgNiFe-LDH during the calcination.

Figure S4



**Figure S4** (a) N<sub>2</sub> adsorption and desorption isotherms and (b) the pore size distribution of the Pt/MgO/Ni<sub>3</sub>Fe/rGO intermediate composite, (c) N<sub>2</sub> adsorption and desorption isotherms and (d) the pore size distribution of the Pt/Ni<sub>3</sub>Fe/rGO composite after the selective removal of MgO.

Figure S5



**Figure S5** Comparison of XPS spectra: (a) a full scan survey and (b) Mg1s spectra for the Pt/MgO/Ni<sub>3</sub>Fe/rGO intermediate composite; (c) a full scan survey and (d) Mg 1s spectra for the Pt/Ni<sub>3</sub>Fe/rGO composite, showing no signal of Mg 1s.

Figure S6



Figure S6 (a) Raman spectrum and (b) TG analysis of the Pt/Ni<sub>3</sub>Fe/rGO composite.

**Figure S7**



**Figure S7** Electrochemical impedance spectra of  $\text{Pt/Ni}_3\text{Fe/rGO}$ ,  $\text{Pt/MgO/Ni}_3\text{Fe/rGO}$ ,  $\text{Ni}_3\text{Fe/rGO}$ ,  $\text{IrO}_2$  for the OER.

**Figure S8**



**Figure S8** XPS spectra of the Pt/Ni<sub>3</sub>Fe/rGO composite after OER stability test: (a) a full scan survey, (b) Pt 4f, (c) Ni 2p, (d) Fe 2p, (e) C 1s and (f) O 1s.

Figure S9



**Figure S9** Electrochemical impedance spectra of Pt/Ni<sub>3</sub>Fe/rGO, Pt/MgO/Ni<sub>3</sub>Fe/rGO, Ni<sub>3</sub>Fe/rGO, Pt/C for the HER.

Figure S10



Figure S10 Cyclic voltammograms (CVs) for (a) Pt/Ni<sub>3</sub>Fe/rGO, (b) Pt/MgO/Ni<sub>3</sub>Fe/rGO, (c) Ni<sub>3</sub>Fe/rGO measured at different scan rates from 10 to 50 mV/s and (d) corresponding C<sub>dl</sub> at 0.2 V vs Ag/AgCl.

**Figure S11**



**Figure S11** LSV curves of OER normalized by ECSA of Pt/Ni<sub>3</sub>Fe/rGO, Pt/MgO/Ni<sub>3</sub>Fe/rGO, and Ni<sub>3</sub>Fe/rGO.

Figure S12



Figure S12 Optimized structures of (a)  $\text{Ni}_3\text{Fe}$  and (b)  $\text{Pt}(111)$ .

**Table S1**

Energy, entropic contribution, zero point energy, and Gibbs free energy of H<sub>2</sub>, O<sub>2</sub>, and H<sub>2</sub>O.

| Molecular           | Energy (eV) | Entropic (eV) | Zero point energy (eV) | Gibbs free energy |
|---------------------|-------------|---------------|------------------------|-------------------|
| H <sub>2</sub> (g)  | -30.87      | 0.40          | 0.27                   | -31.00            |
| O <sub>2</sub> (g)  | -868.41     | 0.63          | 0.10                   | -868.94           |
| H <sub>2</sub> O(l) | -467.83     | 0.67          | 0.57                   | -467.93           |

**Table S2**

ICP analysis for Ni, Fe, Pt of Pt/Ni<sub>3</sub>Fe/rGO composite.

| Element      | Ni    | Fe    | Pt   |
|--------------|-------|-------|------|
| Content /wt% | 33.15 | 10.42 | 0.71 |

**Table S3**

$R_{ct}$  values of Pt/Ni<sub>3</sub>Fe/rGO, Pt/MgO/Ni<sub>3</sub>Fe/rGO, Ni<sub>3</sub>Fe/rGO and IrO<sub>2</sub> for the OER.

| Catalyst        | Pt/Ni <sub>3</sub> Fe/rGO | Pt/MgO/Ni <sub>3</sub> Fe/rGO | Ni <sub>3</sub> Fe/rGO | IrO <sub>2</sub> |
|-----------------|---------------------------|-------------------------------|------------------------|------------------|
| $R_{ct}/\Omega$ | 1.3                       | 4.1                           | 2.2                    | 9.3              |

**Table S4**

$R_{ct}$  values of Pt/Ni<sub>3</sub>Fe/rGO, Pt/MgO/Ni<sub>3</sub>Fe/rGO, Ni<sub>3</sub>Fe/rGO and IrO<sub>2</sub> for the HER.

| Catalyst        | Pt/Ni <sub>3</sub> Fe/rGO | Pt/MgO/Ni <sub>3</sub> Fe/rGO | Ni <sub>3</sub> Fe/rGO | Pt/C |
|-----------------|---------------------------|-------------------------------|------------------------|------|
| $R_{ct}/\Omega$ | 3.2                       | 6.7                           | 5.6                    | 1.4  |

**Table S5**

Comparison of the OER performance between the Pt/Ni<sub>3</sub>Fe/rGO composite and those Pt-based electrocatalysts reported previously (in 1.0 M KOH).

| Catalysts                                       | Pt content (wt%) | Overpotential (mV) | Tafel (mv dec <sup>-1</sup> ) | References       |
|-------------------------------------------------|------------------|--------------------|-------------------------------|------------------|
| Pt-NiO/Gr-SUS                                   | 0.09             | 240                | 101.2                         | 1                |
| Pt-SnFeNi/CF                                    | 0.42             | -                  | 103                           | 2                |
| NF-Na-Fe-Pt                                     | 0.60             | 261                | 39.68                         | 3                |
| Pt- $\alpha$ Fe <sub>2</sub> O <sub>3</sub> /NF | 2.05             | 304                | 49.6                          | 4                |
| Pt-WO <sub>3-x</sub> @rGO                       | 1.58             | 174                | 48                            | 5                |
| Pt <sub>1</sub> @Fe-N-C                         | 2.10             | 310                | 62                            | 6                |
| Pt-Ni <sub>3</sub> Se <sub>2</sub> @NiOOH/NF    | 8.20             | -                  | 31                            | 7                |
| Pt/NiFeV                                        | 16.80            | -                  | 48                            | 8                |
| Pt/LiCoO <sub>2</sub>                           | 30.00            | 258                | 46.8                          | 9                |
| PtIr/IrO <sub>x</sub> -50                       | 50.97            | 266                | 44                            | 10               |
| Pt-NiFe PBA                                     | -                | 210                | 43.5                          | 11               |
| NM@Pt <sub>0.15</sub> -Ni(OH) <sub>2</sub>      | -                | 309                | 52                            | 12               |
| B-Pt-NiFe-LDH                                   | 0.781            | 208                | 30.4                          | 13               |
| Pt/Ni <sub>3</sub> Fe/rGO                       | 0.71             | 240                | 35                            | <b>This work</b> |

**Table S6**

Comparison of the HER performance between the Pt/Ni<sub>3</sub>Fe/rGO composite and those Pt-based electrocatalysts reported previously (in 1.0 M KOH).

| Catalysts                                       | Pt content (wt%) | Overpotential (mV) | Tafel (mv dec <sup>-1</sup> ) | References       |
|-------------------------------------------------|------------------|--------------------|-------------------------------|------------------|
| Pt-NiO/Gr-SUS                                   | 0.09             | 79                 | 41                            | 1                |
| Pt-SnFeNi/CF                                    | 0.42             | 20                 | -                             | 2                |
| NF-Na-Fe-Pt                                     | 0.60             | 31                 | 35.98                         | 3                |
| Pt- $\alpha$ Fe <sub>2</sub> O <sub>3</sub> /NF | 2.05             | 90                 | 50.6                          | 4                |
| Pt-WO <sub>3-x</sub> @rGO                       | 1.58             | 37                 | 35                            | 5                |
| Pt <sub>1</sub> @Fe-N-C                         | 2.10             | 60                 | 42                            | 6                |
| Pt-Ni <sub>3</sub> Se <sub>2</sub> @NiOOH/NF    | 8.20             | 46                 | 45                            | 7                |
| Pt/NiFeV                                        | 16.80            | 19                 | 33                            | 8                |
| Pt/LiCoO <sub>2</sub>                           | 30.00            | 61                 | 39.5                          | 9                |
| PtIr/IrOx-30                                    | 69.80            | 20                 | 38                            | 10               |
| Pt-NiFe PBA                                     | -                | 29                 | 58.3                          | 11               |
| Pt/SnS <sub>2</sub>                             | 0.37             | 117                | 69                            | 14               |
| hcp Pt-Ni                                       | 30.16            | 65                 | 78                            | 15               |
| Pt-Ni/LDH                                       | 5.50             | 52                 | 47                            | 16               |
| Pt1/Co(OH) <sub>2</sub> /C                      | 1.41             | 50                 | 48.7                          | 17               |
| Pt/Ni <sub>3</sub> Fe/rGO                       | 0.71             | 76                 | 43                            | <b>This work</b> |

**Table S7**

Comparison of overall-water-splitting performance at 10 mA cm<sup>-2</sup> between the Pt/Ni<sub>3</sub>Fe/rGO composite and those Pt-based electrocatalysts reported previously (in 1.0 M KOH).

| Catalysts                                                | Pt content (wt%) | Overall voltage (V) | Durability (h) | References       |
|----------------------------------------------------------|------------------|---------------------|----------------|------------------|
| Pt-NiO/Gr-SUS                                            | 0.09             | 1.6                 | 12             | 1                |
| NF-Na-Fe-Pt                                              | 0.60             | 1.56                | 12             | 3                |
| Pt- $\alpha$ Fe <sub>2</sub> O <sub>3</sub> /NF          | 2.05             | 1.51                | 50             | 4                |
| Pt-WO <sub>3-x</sub> @rGO                                | 1.58             | 1.55                | 12             | 5                |
| Pt-Ni <sub>3</sub> Se <sub>2</sub> @NiOOH/NF             | 8.20             | 1.52                | 12             | 7                |
| Pt-NiMoO <sub>4</sub> -GO/NF                             | 4.63             | 1.515               | 48             | 18               |
| Pt-CoS <sub>2</sub> /CC                                  | 4.5              | 1.55                | 20             | 19               |
| Pt-Cu@Cu <sub>x</sub> O NWs/3DF                          | 0.74             | 1.56                | 27             | 20               |
| Pt-Ni <sub>2/3</sub> Fe <sub>1/3</sub> (OH) <sub>2</sub> | 6.15             | -                   | 15             | 21               |
| PtCo-FeCo PBAs                                           | 8.4              | 1.68                | 50             | 22               |
| Pt/VC                                                    | 2.84             | 1.59                | 12             | 23               |
| Pt/Ni <sub>3</sub> Fe/rGO                                | 0.71             | 1.55                | 50             | <b>This work</b> |

### References

1. S. Jeong, H. D. Mai, K.-H. Nam, C.-M. Park and K.-J. Jeon, *ACS Nano*, 2022, **16**, 930-938.
2. S. Li, R. Ma, Y. Lu, Y. Pei, M. Yang, J. Wang and D. Liu, *J. Mater. Chem. A*, 2020, **8**, 5919-5926.
3. Y. Zhao, Y. Gao, Z. Chen, Z. Li, T. Ma, Z. Wu and L. Wang, *Appl. Catal. B*, 2021, **297**, 120395.
4. B. Ye, L. Huang, Y. Hou, R. Jiang, L. Sun, Z. Yu, B. Zhang, Y. Huang and Y.

- Zhang, *J. Mater. Chem. A*, 2019, **7**, 11379-11386.
5. D. Yin, Y.-D. Cao, D.-F. Chai, L.-L. Fan, G.-G. Gao, M.-L. Wang, H. Liu and Z. Kang, *Chem. Eng. J*, 2022, **431**, 133287.
  6. X. Zeng, J. Shui, X. Liu, Q. Liu, Y. Li, J. Shang, L. Zheng and R. Yu, *Adv. Energy Mater.*, 2017, **8**, 1701345.
  7. X. Zheng, Y. Cao, X. Han, H. Liu, J. Wang, Z. Zhang, X. Wu, C. Zhong, W. Hu and Y. Deng, *Sci. China Mater.*, 2019, **62**, 1096-1104.
  8. Y. Feng, Z. Li, S. Li, M. Yang, R. Ma and J. Wang, *J. Energy Chem.*, 2022, **66**, 493-501.
  9. X. Zheng, P. Cui, Y. Qian, G. Zhao, X. Zheng, X. Xu, Z. Cheng, Y. Liu, S. X. Dou and W. Sun, *Angew. Chem. Int. Ed.*, 2020, **59**, 14533-14540.
  10. H. Huang, L. Fu, W. Kong, H. Ma, X. Zhang, J. Cai, S. Wang, Z. Xie and S. Xie, *Small*, 2022, **18**, 2201333.
  11. Z. Chen, D. Liu, Y. Gao, Y. Zhao, W. Xiao, G. Xu, T. Ma, Z. Wu and L. Wang, *Sci. China Mater.*, 2021, **65**, 1217-1224.
  12. J. Zhang, M. Yang, X. Zhu, J. Dang, J. Ma, B. Liu, T. Huang, M. Ouyang and F. Yang, *Chem. Eng. J.*, 2023, **476**, 146576.
  13. L. Tan, H. Wang, C. Qi, X. Peng, X. Pan, X. Wu, Z. Wang, L. Ye, Q. Xiao, W. Luo, H. Gao, W. Hou, X. Li and T. Zhan, *Appl. Catal. B*, 2024, **342**, 123352.
  14. F. Xia and F. Yang, *Energy Fuels*, 2022, **36**, 4992-4998.
  15. Z. Cao, Q. Chen, J. Zhang, H. Li, Y. Jiang, S. Shen, G. Fu, B.-a. Lu, Z. Xie and L. Zheng, *Nat. Commun.*, 2017, **8**, 15131.
  16. W. Yi, R. Yu, H. Jiang, J. Wu and G. J. Cheng, *Adv. Funct. Mater.*, 2024, **34**, 2308575.
  17. A. Pei, R. Xie, Y. Zhang, Y. Feng, W. Wang, S. Zhang, Z. Huang, L. Zhu, G. Chai, Z. Yang, Q. Gao, H. Ye, C. Shang, B. H. Chen and Z. Guo, *Energy Environ. Sci.*, 2023, **16**, 1035-1048.
  18. J. Zhang, S. Zhang, X. Zhang, Z. Ma, Z. Wang and B. Zhao, *J. Colloid Interf. Sci.*, 2023, **650**, 1490-1499.

19. X. Han, X. Wu, Y. Deng, J. Liu, J. Lu, C. Zhong and W. Hu, *Adv. Energy Mater.*, 2018, **8**, 1800935.
20. D. T. Tran, H. T. Le, T. L. Luyen Doan, N. H. Kim and J. H. Lee, *Nano Energy*, 2019, **59**, 216.
21. L. Wang, L. Zhang, W. Ma, H. Wan, X. Zhang, X. Zhang, S. Jiang, J. Y. Zheng and Z. Zhou, *Adv. Funct. Mater.*, 2022, **32**, 2203342.
22. C. Zeng, Q. Li, Y. You, L. Sun, W. Cheng, X. Zheng, S. Liu and Q. Wang, *Int. J. Hydrogen Energy*, 2022, **47**, 35149.
23. N. Wang, X. Bo and M. Zhou, *ACS Appl. Mater. Interfaces*, 2022, **14**, 23332-23341.
